# Supplementary material
Source: HighWire-hosted journal article supplement (https://jech.bmj.com/content/77/3/175)
Supplement: inline-supplementary-material-1 [file inline-supplementary-material-1.pdf]

## SUPPLEMENTARY MATERIAL

### Supplement to:

**Snieguole Vingeliene,<sup>1</sup> Ayako Hiyoshi,<sup>1,2,3,5</sup> Marleen Lentjes,<sup>1</sup> Katja Fall,<sup>1,3</sup> Scott Montgomery<sup>1,4,5</sup>**

**Decreasing grip strength and subsequent loneliness: English Longitudinal Study of Ageing**

### Contents

**Supplementary Table 1:** Missingness among the study participants (N = 9084) at baseline, by sex.

**Supplementary Table 2:** Change in loneliness score estimated from the UCLA loneliness scale for each 5 kg change in grip strength, complete-case analysis after recoding change in grip strength between - 2 kg to + 2 kg as no change.

**Supplementary Table 3:** Change in loneliness score estimated from the UCLA loneliness scale for each 5 kg change in grip strength, complete-case analysis after excluding the highest 1% (n = 77) of grip strength values.

**Supplementary Table 4:** Change in loneliness score estimated from the UCLA loneliness scale for each 5 kg change in grip strength, complete-case analysis after excluding the lowest 1% (n = 48) of grip strength values.

**Supplementary Table 5:** Change in loneliness score estimated from the UCLA loneliness scale for each 5 kg change in grip strength, complete-case analysis after excluding participants with the highest UCLA loneliness score of nine at baseline.

### Multiple imputation

**Supplementary Table 6:** Change in loneliness score estimated from the UCLA loneliness scale for each 5 kg change in grip strength with imputed datasets.

**Supplementary Table 1.** Distribution of baseline characteristics and missingness (N = 9084), by sex.

|                                                         | Men                | Women              |
|---------------------------------------------------------|--------------------|--------------------|
|                                                         | n = 4056<br>45 (%) | n = 5028<br>55 (%) |
|                                                         | n (%)              | n (%)              |
| Grip strength (kg) (mean (SD))                          | 41.2 (9.8)         | 24.4 (6.7)         |
| Available                                               | 3576 (88)          | 4348 (86)          |
| Missing*                                                | 480 (12)           | 680 (14)           |
| Age (years) (median)                                    | 62                 | 62                 |
| Available                                               | 4056 (100)         | 5028 (100)         |
| Missing                                                 | 0                  | 0                  |
| Employment status                                       |                    |                    |
| Retired                                                 | 1912 (47)          | 2304 (46)          |
| Employed                                                | 1771 (44)          | 1672 (33)          |
| Unemployed                                              | 113 (3)            | 802 (16)           |
| Permanently sick or disabled                            | 259 (6)            | 248 (5)            |
| Missing                                                 | 1 (0)              | 2 (0)              |
| Socio-economic classification (NS-SEC)<br>by occupation |                    |                    |
| Managerial, professional occupations                    | 1684 (42)          | 1398 (28)          |
| Intermediate occupations                                | 804 (20)           | 1392 (28)          |
| Routine and manual occupations                          | 1499 (37)          | 2150 (43)          |
| Missing                                                 | 69 (2)             | 88 (2)             |
| Living alone                                            |                    |                    |
| No                                                      | 3343 (82)          | 3594 (71)          |
| Yes                                                     | 713 (18)           | 1434 (29)          |
| Missing                                                 | 0                  | 0                  |
| Arthritis                                               |                    |                    |
| No                                                      | 3710 (91)          | 4407 (88)          |
| Yes                                                     | 344 (8)            | 619 (12)           |
| Missing                                                 | 2 (0)              | 2 (0)              |
| Cancer                                                  |                    |                    |
| No                                                      | 3955 (98)          | 4886 (97)          |
| Yes                                                     | 98 (2)             | 139 (3)            |
| Missing                                                 | 3 (0)              | 3 (0)              |
| Diabetes                                                |                    |                    |
| No                                                      | 3844 (95)          | 4847 (96)          |
| Yes                                                     | 210 (5)            | 181 (4)            |
| Missing                                                 | 2 (0)              | 0                  |
| Cardiovascular diseases                                 |                    |                    |
| No                                                      | 3804 (94)          | 4805 (96)          |
| Yes                                                     | 250 (6)            | 223 (4)            |
| Missing                                                 | 2 (0)              | 0                  |
| Stroke                                                  |                    |                    |
| No                                                      | 3992 (98)          | 4968 (99)          |
| Yes                                                     | 62 (2)             | 60 (1)             |
| Missing                                                 | 2 (0)              | 0                  |
| UCLA loneliness scale score 3 to 9<br>(median (IQR))    | 3 (3 - 5)          | 4 (3 - 5)          |
| Available                                               | 3568 (88)          | 4455 (89)          |
| Missing                                                 | 488 (12)           | 573 (11)           |

The baseline comprises 9084 participants who provided data in all three or two consecutive waves of ELSA.

\*The main reason for missing grip strength measurements is a refusal to participate in the nurse visit.

**Supplementary Table 2.** Change in loneliness score estimated from the UCLA loneliness scale for each 5 kg change in grip strength, complete-case analysis after recoding change in grip strength between - 2 kg to + 2 kg as no change.

|                                  | <b>Men (n = 2769)</b>  |         | <b>Women (n = 3349)</b> |         |
|----------------------------------|------------------------|---------|-------------------------|---------|
|                                  | $\beta$ (95% CI)       | P value | $\beta$ (95% CI)        | P value |
| <b>Decrease in grip strength</b> |                        |         |                         |         |
| Unadjusted                       | 0.05 (0.03 to 0.08)    | < 0.001 | 0.08 (0.03 to 0.12)     | < 0.001 |
| Adjusted*                        | 0.04 (- 0.001 to 0.07) | 0.057   | 0.03 (- 0.02 to 0.08)   | 0.265   |
| <b>Increase in grip strength</b> |                        |         |                         |         |
| Unadjusted                       | 0.02 (- 0.03 to 0.08)  | 0.405   | 0.01 (- 0.06 to 0.08)   | 0.751   |
| Adjusted*                        | 0.01 (- 0.05 to 0.07)  | 0.699   | -0.02 (- 0.10 to 0.06)  | 0.579   |

\*Adjusted for age, living alone, employment status, NS-SEC occupation category, diagnoses of arthritis, cancer, diabetes, cardiovascular diseases, and stroke.

**Supplementary Table 3.** Change in loneliness score estimated from the UCLA loneliness scale for each 5 kg change in grip strength, complete-case analysis after excluding the highest 1% (n=77) of grip strength values.

|                                  | <b>Men (n = 2769)</b>  |         | <b>Women (n = 3349)</b> |         |
|----------------------------------|------------------------|---------|-------------------------|---------|
|                                  | $\beta$ (95% CI)       | P value | $\beta$ (95% CI)        | P value |
| <b>Decrease in grip strength</b> |                        |         |                         |         |
| Unadjusted                       | 0.05 (0.03 to 0.08)    | < 0.001 | 0.08 (0.03 to 0.12)     | 0.001   |
| Adjusted*                        | 0.04 (- 0.004 to 0.08) | 0.076   | 0.03 (- 0.03 to 0.08)   | 0.365   |
| <b>Increase in grip strength</b> |                        |         |                         |         |
| Unadjusted                       | 0.02 (- 0.03 to 0.08)  | 0.428   | 0.01 (- 0.06 to 0.08)   | 0.726   |
| Adjusted*                        | 0.01 (- 0.05 to 0.07)  | 0.686   | -0.03 (- 0.11 to 0.05)  | 0.520   |

\*Adjusted for age, living alone, employment status, NS-SEC occupation category, diagnoses of arthritis, cancer, diabetes, cardiovascular diseases, and stroke.

**Supplementary Table 4.** Change in loneliness score estimated from the UCLA loneliness scale for each 5 kg change in grip strength, complete-case analysis after excluding the lowest 1% (n = 48) of grip strength values.

|                                  | <b>Men (n = 2769)</b>  |         | <b>Women (n = 3349)</b>   |         |
|----------------------------------|------------------------|---------|---------------------------|---------|
|                                  | $\beta$ (95% CI)       | P value | $\beta$ (95% CI)          | P value |
| <b>Decrease in grip strength</b> |                        |         |                           |         |
| Unadjusted                       | 0.05 (0.03 to 0.08)    | < 0.001 | 0.08 (0.04 to 0.12)       | < 0.001 |
| Adjusted*                        | 0.04 (- 0.004 to 0.07) | 0.075   | 0.04 (-0.02 to 0.09)      | 0.188   |
| <b>Increase in grip strength</b> |                        |         |                           |         |
| Unadjusted                       | 0.04 (- 0.02 to 0.09)  | 0.210   | 0.03 (- 0.04 to 0.10)     | 0.359   |
| Adjusted*                        | 0.02 (- 0.04 to 0.09)  | 0.454   | - 0.0002 (- 0.08 to 0.08) | 0.996   |

\*Adjusted for age, living alone, employment status, NS-SEC occupation category, diagnoses of arthritis, cancer, diabetes, cardiovascular diseases, and stroke.

**Supplementary Table 5.** Change in loneliness score estimated from the UCLA loneliness scale for each 5 kg change in grip strength, complete-case analysis after excluding participants with the highest UCLA loneliness score of nine at baseline.

|                                  | <b>Men (n = 2769)</b>  |         | <b>Women (n = 3349)</b> |         |
|----------------------------------|------------------------|---------|-------------------------|---------|
|                                  | $\beta$ (95% CI)       | P value | $\beta$ (95% CI)        | P value |
| <b>Decrease in grip strength</b> |                        |         |                         |         |
| Unadjusted                       | 0.06 (0.03 to 0.08)    | < 0.001 | 0.10 (0.06 to 0.14)     | < 0.001 |
| Adjusted*                        | 0.04 (- 0.003 to 0.08) | 0.068   | 0.03 (- 0.02 to 0.09)   | 0.231   |
| <b>Increase in grip strength</b> |                        |         |                         |         |
| Unadjusted                       | 0.04 (- 0.01 to 0.09)  | 0.095   | 0.03 (- 0.05 to 0.10)   | 0.485   |
| Adjusted*                        | 0.03 (- 0.02 to 0.08)  | 0.291   | - 0.03 (- 0.11 to 0.05) | 0.433   |

\*Adjusted for age, living alone, employment status, NS-SEC occupation category, diagnoses of arthritis, cancer, diabetes, cardiovascular diseases, and stroke.

### Multiple imputation

We applied multiple imputation by chained equations and generated 5 imputations for all participants who participated in the main interview on three or two consecutive occasions. The imputation model included all variables used in the analysis and was weighted using the weight provided in data. The auxiliary variables used for imputation included the following: whether the respondent felt lonely during the past week (yes, no), how often the respondent feels lonely (hardly ever or never, some of the time, often), how often the respondent feels out of tune with people around them (hardly ever or never, some of the time, often), how many children the respondent believes they have a close relationship with (0 or no children, 1, 2,  $\geq 3$ ), how close the respondent's relationship is to their spouse/partner (very close, quite close, not very close/not at all close), how many family members the respondent has a close relationship with (no close relatives or close with none, 1-2,  $\geq 3$ ), how many friends the respondent has a close relationship with (count), whether the respondent has a hobby or pastime (yes, no), access to a car when needed, either as a passenger or a driver (yes, no), self-reported general health (excellent/very good, good, fair/poor), employed (yes, no), frequency of vigorous, moderate and mild sports or activities categorized into >1 time/week, 1 time/week to 1-3 times/month, and hardly ever or never, and height (cm).

**Supplementary Table 6.** Change in loneliness score estimated from the UCLA loneliness scale for each 5 kg change in grip strength with imputed datasets.

|                                  | <b>Men (n = 3251)</b>  |         | <b>Women (n = 4065)</b> |         |
|----------------------------------|------------------------|---------|-------------------------|---------|
|                                  | $\beta$ (95% CI)       | P value | $\beta$ (95% CI)        | P value |
| <b>Decrease in grip strength</b> |                        |         |                         |         |
| Unadjusted                       | 0.06 (0.03 to 0.09)    | < 0.001 | 0.09 (0.05 to 0.13)     | < 0.001 |
| Adjusted*                        | 0.04 (- 0.002 to 0.07) | 0.066   | 0.04 (- 0.02 to 0.09)   | 0.181   |
| <b>Increase in grip strength</b> |                        |         |                         |         |
| Unadjusted                       | 0.01 (- 0.03 to 0.06)  | 0.598   | 0.02 (- 0.04 to 0.09)   | 0.480   |
| Adjusted*                        | 0.003 (- 0.05 to 0.06) | 0.919   | - 0.02 (- 0.10 to 0.05) | 0.550   |

\*Adjusted for age, living alone, employment status, NS-SEC occupation category, diagnoses of arthritis, cancer, diabetes, cardiovascular diseases, and stroke.
